# Supplementary material
Source: HighWire-hosted journal article supplement (https://cmaj.ca/highwire/filestream/149707/field_highwire_adjunct_files/1/230492-res-2-at.pdf)

**Appendix 2.** Flow diagram of the overall cohort and outcome of 72 hour ED visit by each cohort.

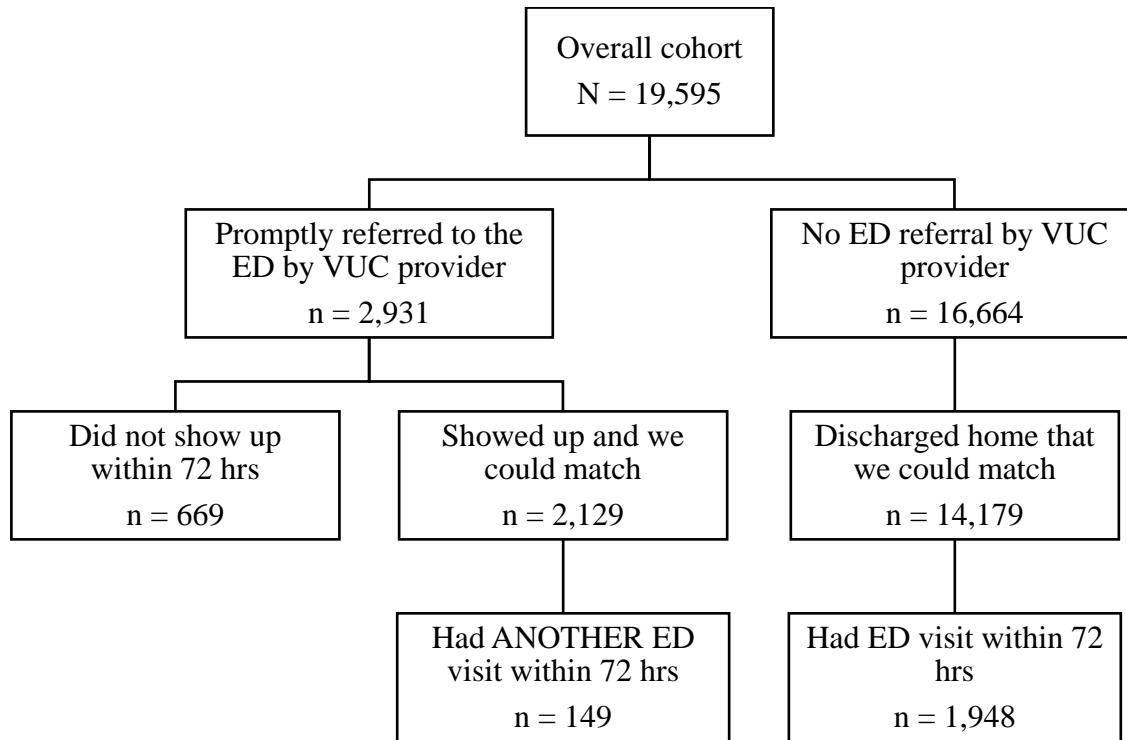

Supplement: 230492-res-2-at.pdf [file 230492-res-2-at.pdf]
